1 Low prevalence of soil transmitted helminth infection in  
2 Ugandan children hospitalized with severe malaria

3  
4 Drew Capone<sup>1</sup>, Nuzrath Jahan<sup>1</sup>, Ruth Namazzi<sup>2,3</sup>, Robert O. Opoka<sup>3,4</sup>, Chandy C. John<sup>5</sup>

5  
6 1. Department of Environmental and Occupational Health, School of Public Health, Indiana  
7 University, Bloomington, Indiana, United States of America

8 2. Makerere University College of Health Sciences, Kampala, Uganda

9 3. Global Health Uganda, Kampala, Uganda

10 4. Aga Khan University East Africa, Nairobi, Kenya

11 5. Department of Pediatrics, School of Medicine, Indiana University, Indianapolis, Indiana,  
12 United States of America

13

14 Corresponding Author:

15 Drew Capone

16 [dscapone@iu.edu](mailto:dscapone@iu.edu)

17

## 18 Abstract

19 Co-infection by intestinal helminths and *Plasmodium* spp. may be common in endemic  
20 communities. Several studies have identified a relationship between helminth infection,  
21 *Plasmodium* spp. infection and malaria severity. However, the relationship is not well defined,  
22 and results are inconclusive. We analyzed 202 stool samples from a cohort of children with  
23 severe malaria enrolled in two hospitals in Uganda from 2014-2017 and asymptomatic  
24 community children from the same household or neighborhood and enrolled at the same time, all  
25 6 months to 48 months of age. We investigated if intestinal helminth infection modified risk of  
26 severe malaria. We extracted nucleic acids from stool and tested them for six helminth species  
27 (*Ancylostoma duodenale*, *Ascaris lumbricoides*, *Necator americanus*, *Strongyloides stercoralis*,  
28 *Trichuris trichiura*, *Shistosoma mansoni*) using highly sensitive quantitative PCR. We found a  
29 low prevalence of infection by  $\geq 1$  intestinal helminth species in children with severe malaria  
30 (5.1%, n=9/177) and community control children (4.0%, n=1/25). Infection by  $\geq 1$  of the  
31 helminths assessed was not associated with severe malaria (aRR = 1.0, 95% Confidence Interval  
32 = 0.82, 1.3, p = 0.78). In 2003 Uganda instituted a national deworming program, with anti-  
33 helminth medication provided twice annually to children 6 months to 5 years of age. In these  
34 areas of Uganda, the national deworming campaign has been highly successful, as stool-based  
35 helminth infection was rare even when using highly sensitive methods of detection and was not a  
36 major contributor to risk of severe malaria.

37

## 38 Introduction

39 Soil-transmitted helminths (STH) are parasitic worms that live in the human gut during the  
40 adult stage of their lifecycle. Worms lay eggs, which are shed in human feces at high  
41 concentrations (e.g., up to 500,00 eggs per gram feces) [1]. Following a period of incubation in  
42 soil, transmission occurs when people ingest or contact the infective lifecycle stage. The most  
43 common STHs include roundworms (*Ascaris lumbricoides*), whipworms (*Trichuris trichiura*),  
44 and hookworms (*Necator americanus* and *Ancylostoma duodenale*). The Global Burden of  
45 Disease study estimates that 294 million people are infected by *Ascaris*, 267 million by  
46 *Trichuris*, and 113 million by hookworm (2021 data) [2]. *Strongyloides stercoralis* is a rare STH  
47 species but is unique in that autoinfection is possible and persistent infections have been reported  
48 for decades [3]. *Schistosoma mansoni* is another intestinal helminth that differs from STHs  
49 because the *Schistosoma* lifecycle requires development in snails in freshwater, where exposure  
50 occurs. It is estimated that *Schistosoma* spp. infect 151 million people (2021 data) [2].

51 The burden of disease from intestinal worms is concentrated in low- and middle-income  
52 countries (LMIC) without adequate sanitation [4]. Yet, modelling in endemic communities has  
53 demonstrated that persistent helminth transmission is possible even in areas where sanitation  
54 coverage is high [5]. As an integrated approach to helminth control, the World Health  
55 Organization recommends improving sanitation infrastructure as well as hygiene education and  
56 preventative chemotherapy [6]. Preventive chemotherapy for intestinal helminths involves the  
57 periodic administration of anthelmintic drugs to at-risk populations. As a part of preventative  
58 chemotherapy efforts, mass drug administration (MDA) programs are employed in endemic  
59 areas where these parasitic infections are prevalent [7]. These programs aim to treat entire  
60 populations, regardless of infection status, with a single dose or multiple doses of anthelmintic

61 drugs such as albendazole or mebendazole, depending on the specific parasites present in the  
62 region.

63 In Uganda, a nationwide survey of more than 20,000 school children was conducted for  
64 STHs from 1998-2005 [8]. Approximately half of children (55%) were infected by  $\geq 1$  STH. The  
65 prevalence of *Trichuris trichiura* was 5.0% (range: 0–68% by school), *Ascaris lumbricoides* was  
66 6.3% (0–89% by school), and hookworm was 44% (0–90% by school). In response to the high  
67 prevalence of helminth infection, the Uganda Ministry of Health began implementation of its  
68 national STH control program in 2003, including twice yearly deworming for school age  
69 children [9]. Later, in 2005, Uganda began implementation of biannual “Child Health Days”.  
70 These health fairs are campaign style events organized by District Health Teams, which includes  
71 deworming every six months for children 12-60 months of age [10].

72 Malaria is an infectious disease caused by *Plasmodium* spp. parasites, which are transmitted  
73 to humans through the bites of an infected female *Anopheles* mosquito. After transmission,  
74 *Plasmodium* enters the bloodstream and invades red blood cells, where the parasite replicates.  
75 Most cases of malaria are uncomplicated or even asymptomatic [11]. Severe malaria occurs in a  
76 small subset of cases, and is characterized by complications that include prostration, severe  
77 anemia, multiple seizures, respiratory distress, or coma. The World Health Organization  
78 estimated there were 249 million cases of malaria in 2023, a 7% increase from 2019 [12].

79 The 85 countries where malaria is endemic has substantial overlap with countries where  
80 STHs are endemic [13,14]. While co-infection is common, there is mixed evidence regarding the  
81 association between *Plasmodium* spp. infection, malaria severity, and STH infection. Individual  
82 studies on co-infections have reported conflicted findings [15]. A 2016 meta-analysis found that  
83 STH infection may increase susceptibility to uncomplicated or asymptomatic *P. falciparum*

84 infection but may protect against malaria-induced anaemia [16]. A 2021 meta-analysis found in  
85 the unadjusted analysis that STH infection was protective against *P. falciparum* infection, but  
86 after adjusting for potential confounders observed that STH infection may increase susceptibility  
87 to *P. falciparum* infection [15]. Despite evidence for a potential interaction between *P.*  
88 *falciparum* and STH infection, the mechanism of interaction remains poorly defined.

89 The Neurodevelopment Outcomes in Children with Severe Malaria Study enrolled children  
90 with severe malaria and asymptomatic community control children from the same neighborhood  
91 or household in Kampala and Jinja, Uganda from 2014-2017. We tested stool samples from a  
92 subset of these study children to determine if intestinal helminth infection modified risk of severe  
93 malaria among children enrolled in the study. Our research aims were to (1) assess the  
94 prevalence of common intestinal helminth species among young children in Uganda using highly  
95 sensitive molecular methods; and (2) determine if intestinal helminths modified risk of severe  
96 malaria among children enrolled in this study.

## 97 Methods

98 We prospectively enrolled 600 children with severe malaria and 120 community children 6  
99 months to 48 months of age at Mulago National Referral Hospital in Kampala and Jinja Regional  
100 Referral Hospital in Jinja, Uganda. Full details of study enrollment, inclusion and exclusion  
101 criteria and study procedures have been previously published [17]. Eligibility criteria for children  
102 with severe malaria included evidence for malaria parasitemia via a rapid diagnostic test or by  
103 Giemsa microscopy and  $\geq 1$  of the five common severe malaria features in Uganda (prostration,  
104 severe anemia, multiple seizures, respiratory distress, and coma). Community children were  
105 enrolled from the nuclear family, extended family, or household area of children enrolled with  
106 severe malaria. Inclusion criteria for community controls was residence in the same or nearby

107 neighborhood as an enrolled child with severe malaria and being 6 months to 48 months of age.  
108 Exclusion criteria included an illness requiring medical care within the previous four weeks, a  
109 major medical or neurological abnormality at screening physical examination, or an active illness  
110 or axillary temperature on screening of  $>37.5^{\circ}\text{C}$ .

111 Following admission, child feces was collected from the child's first bowel movement into  
112 sterile collection containers, which were aliquoted into 2mL cryovials. Community children were  
113 provided a stool container and asked to bring back a stool sample within 1 month of enrollment.  
114 Samples were stored at  $-80^{\circ}\text{C}$  in Uganda shipped to Indiana University on dry ice at the  
115 completion of the study. Samples at Indiana University were again stored at  $-80^{\circ}\text{C}$ .

116 We selected a subset of 202 stools for inclusion in this study based on: (1) the stool sample  
117 was collected  $\leq 48$  hours after admission and (2) adequate stool was available for nucleic acid  
118 extraction. These criteria included fecal samples from 177 children with severe malaria and 25  
119 community controls. A sample size of 177 children with severe malaria and 25 community  
120 control children provided  $\geq 80\%$  power to detect a  $\geq 17\%$  absolute difference in intestinal  
121 helminth infection rates in the children with severe malaria, if the baseline rate of stool helminth  
122 infection in the control group was 20% [8,18]. We extracted DNA from 100mg of child feces  
123 using the QIAamp 96 Virus QIAcube HT Kit (Qiagen, Hilden, Germany), which we automated  
124 on the QIAcube. Extraction included a pre-treatment step with Qiagen PowerBead Pro Tubes  
125 (Qiagen, Hilden, Germany), which we have previously validated for multi-pathogen analysis  
126 [19,20]. We included at least one negative extraction control on each day of DNA extractions  
127 and spiked an extraction positive control (i.e., bovine herpes virus) into each sample.

128 We used quantitative PCR (qPCR) to measure nucleic acids for five common STH species  
129 including *Ancylostoma duodenale*, *Ascaris lumbricoides*, *Necator americanus*, *Strongyloides*

130 *stercolaris*, and *Trichuris trichiura* as well as *Shistosoma mansoni*, which is another intestinal  
131 helminth species endemic in Uganda [21]. PCR was performed via a custom TaqMan Array Card  
132 (TAC) on a Quantstudio 7 Flex Instrument (Applied Biosystems, Waltham, MA). At least one  
133 positive control (i.e., a plasmid with all gene targets) and one negative control was run each day  
134 of PCR analysis. We developed a standard curve for TAC using the methods described in Kodani  
135 and Winchell 2012 [22]. Quantification cycle was determined via manual thresholding, by  
136 comparing sample amplification against our daily positive and negative controls. Additional data  
137 on PCR reaction conditions and QA/QC can be found in the appendix (S1 Text, S1 Table).

138 We generated summary statistics using Microsoft Excel 365 and performed statistical  
139 analyses in RStudio (R Foundation for Statistical Computing, Vienna, Austria, Version 4.2.3).  
140 We assessed if infection by  $\geq 1$  helminth modified risk of severe malaria using Poisson regression  
141 modeling. In our model, severe malaria status was the dependent variable, while helminth  
142 infection, age, and socioeconomic status were included as independent variables. We accounted  
143 for clustering by study site [23].

#### 144 **Ethical Approval**

145 Initial verbal consent from the parents or legal guardians of study participants was obtained  
146 for children fulfilling inclusion criteria, since most participants were critically ill and required  
147 emergency stabilization. Written informed consent was obtained once the participant was  
148 clinically stabilized. Ethical approval was granted by the Institutional Review Boards at  
149 Makerere University School of Medicine, the University of Minnesota, Indiana University, and  
150 regulatory approval granted by the Uganda National Council for Science and Technology.

## 151 Results

152 We found a low prevalence of helminth infection among children with severe malaria and  
 153 community controls. The prevalence of any helminth infection was similar children with severe  
 154 malaria (5.1%, n=9/177) and community control children (4.0%, n=1/25) (Table 1). *Necator*  
 155 *americanus* was the most frequently detected helminth (severe malaria 1.7%, community  
 156 controls 4.0%), followed by *Trichuris trichiura* (severe malaria 1.7%, community controls 0%),  
 157 *Schistosoma mansoni* (severe malaria 1.1%, community controls 0%), *Ascaris lumbricoides*  
 158 (severe malaria 0.6%, community controls 0%), and we did not detect *Strongyloides stercoralis*  
 159 or *Ancylostoma duodenale*. Infection by  $\geq 1$  of the helminths assessed was not associated with  
 160 severe malaria (aRR = 1.0, 95% Confidence Interval = 0.82, 1.3, p = 0.78) via Poisson regression  
 161 modelling (S2 Table).

162 Table 1. Prevalence of intestinal helminth infection among children with severe malaria and  
 163 community controls

| Pathogen                         | Severe Malaria |                                                     | Community Controls |                                                     | t-test p value |
|----------------------------------|----------------|-----------------------------------------------------|--------------------|-----------------------------------------------------|----------------|
|                                  | Prevalence     | Median ova concentration (gene copies/gram feces) * | Prevalence         | Median ova concentration (gene copies/gram feces) * |                |
| $\geq 1$ helminth                | 5.1% (9/177)   |                                                     | 4.0% (1/25)        |                                                     | 0.80           |
| <i>Ancylostoma duodenale</i>     | 0% (0/177)     | Not detected                                        | 0% (0/25)          | Not detected                                        | NA             |
| <i>Strongyloides stercoralis</i> | 0% (0/177)     | Not detected                                        | 0% (0/25)          | Not detected                                        | NA             |
| <i>Ascaris lumbricoides</i>      | 0.6% (1/177)   | 3.1 log <sub>10</sub>                               | 0% (0/25)          | Not detected                                        | 0.32           |
| <i>Schistosoma mansoni</i>       | 1.1% (2/177)   | 6.5 log <sub>10</sub>                               | 0% (0/25)          | Not detected                                        | 0.16           |
| <i>Trichuris trichiura</i>       | 1.7% (3/177)   | 2.3 log <sub>10</sub>                               | 0% (0/25)          | Not detected                                        | 0.08           |
| <i>Necator americanus</i>        | 1.7% (3/177)   | 5.1 log <sub>10</sub>                               | 4.0% (1/25)        | 2.6 log <sub>10</sub>                               | 0.58           |

164 Note: \*Calculation of median excludes non-detects

165 Helminth prevalence was similar among children enrolled in Kampala (6.7%, n=7/105)  
 166 and Jinja (3.1%, n=3/97) (t-test p value = 0.24). The single *Ascaris* infection and both  
 167 *Schistosoma* infections were detected in children from Kampala. Hookworm infections (i.e.,  
 168 *Necator americanus*) were split equally across the sites (n=2 in Kampala and n=2 in Jinja). For  
 169 *Trichuris* two of the three infections were in children from Kampala while the third infection was  
 170 observed in Jinja.



## 171 Discussion

172 We observed a low prevalence of intestinal helminth infection in children with severe  
173 malaria and community controls who were enrolled in this study. These results support the  
174 effectiveness of the national semi-annual deworming campaign in Uganda. In addition, they add  
175 to previous studies showing a decrease in intestinal helminth infections using the Kato-Katz  
176 method [24] by demonstrating that infections were very low in these communities even when  
177 stool was tested by highly sensitive qPCR, which is more sensitive than microscopy [25]. Due to  
178 the low prevalence of intestinal helminth infection, and especially the low prevalence of  
179 individual species, these results do not offer insight into the relationship between helminths and  
180 the susceptibility to *Plasmodium* spp. infection or malaria severity among young children.  
181 Instead, our results provide evidence that severe malaria occurred frequently in an area with a  
182 very low prevalence of intestinal helminth infections, as evaluated by highly sensitive qPCR.  
183 The study data suggest that in these areas, intestinal helminth infections play little role in the risk  
184 of development of severe malaria.

185 While intestinal helminth infection prevalence was low, other factors may modify risk of  
186 *Plasmodium* spp. infection and malaria severity. Infection by pathogenic enteric viruses,  
187 bacteria, and protozoa are common in children in low-income countries, with combined enteric  
188 pathogen prevalence often approaching 100% [26–28]. It remains unclear if and how other  
189 enteric pathogens may modify risk of *Plasmodium* infection and malaria severity. However,  
190 there is increasing evidence the gut microbiome is a risk factor of severe malaria and that the gut  
191 microbiome plays a role in malaria pathogenesis [29].

192 National level surveillance for intestinal helminth infections has not been conducted in  
193 Uganda since the 1998-2005 nationwide survey [8]. A follow-up study of five districts in 2022 –

194 which did not overlap with the districts we enrolled children from – found that intestinal  
195 helminth prevalence had decreased in most districts, but localized heterogeneity in infection  
196 prevalence persists [24]. Another study of six regions of Uganda, which also did not include  
197 Kampala and Jinja in its testing, found low rates of stool helminth infection, with some  
198 heterogeneity by region, but overall rates, particularly for hookworm infection (*Necator*  
199 *americanus* or *Ancylostoma duodenale*) were higher than in this study. Of note, all of these  
200 studies used Kato-Katz microscopy to detect stool helminth infections, while in the current study  
201 we used highly sensitive qPCR to detect intestinal helminth ova shed in stool. Thus, the results of  
202 this study provide strong new evidence for lack of stool helminth infection, even at very low  
203 concentrations, in most children in Kampala and Jinja. The World Health Organization has  
204 shifted its focus from coverage-based deworming targets to eliminating helminth morbidity as a  
205 public health problem. Elimination of helminth morbidity is defined in this program as <2%  
206 prevalence in children of moderate-to-heavy intensity infection from any STH [30]. However,  
207 there remains a lack of consensus on interpreting qPCR data to determine infection severity  
208 because the number of gene copies per ova varies between species and increases as the ova  
209 develops [31]. For example, the number of gene copies of the *Ascaris* spp. gene target ITS-1  
210 increases from <10 per egg to approximately 10,000 after 10 days of incubation [32]. Though  
211 our study had a small sample size and did not characterize infection severity, the low prevalence  
212 of any helminth infection we detected provides suggestive evidence that the WHO morbidity  
213 target is close to being achieved in the communities we studied. It is possible that some de-  
214 worming resources could be re-allocated from the districts we studied to other districts in  
215 Uganda where intestinal helminths remain a greater public health problem, though this could risk  
216 a recurrence of higher rates of intestinal helminth infection in this area.

217 Intestinal helminth surveys in Uganda – as well as in other endemic countries – primarily use  
218 microscopy (e.g., kato-katz, mini-FLOTAC) to detect eggs in stool [8,33]. Molecular techniques,  
219 such as qPCR, offer superior sensitivity to microscopy and may be advantageous for helminth  
220 studies in low-prevalence communities [34]. While microscopy is labor-intensive and requires  
221 highly trained technicians, the reagents and equipment needed for microscopy are substantially  
222 cheaper than for molecular methods. In low- and middle-income countries where helminths are  
223 endemic, molecular methods may be a useful complementary tool to microscopy for surveillance  
224 in communities with a low prevalence of infection.

225 Study limitations include a small sample size, which permitted detection of only large  
226 differences in stool helminth infection rates between children with severe malaria and  
227 community children. In addition, this study’s sample size was much smaller than those of  
228 helminth surveillance studies in Uganda [24]. Study strengths include the rigorously  
229 characterized cohort of children with severe malaria and the use of modern molecular methods  
230 with a higher sensitivity than microscopy [34]. Future work on the relation between intestinal  
231 helminth infection and malaria in communities with a higher prevalence of helminth infection  
232 will be important to better elucidate the relationship between these pathogens. However, the  
233 study results suggest that in Kampala and Jinja, stool helminth infection is rare and therefore an  
234 unlikely contributor to risk of severe malaria.

235 Community helminth and malaria prevalence are mediated by multiple factors including the  
236 environment, household infrastructure, personal behavior (e.g., wearing shoes to prevent  
237 hookworm infection or using insecticide treated bed nets to prevent malaria), and the frequency  
238 of preventative chemotherapy [1,6,35–37]. Integrated approaches – such as those promoted by  
239 the World Health Organization – have made substantial progress in reducing morbidity from

240 helminth infections globally since the year 2000 [2]. Control efforts have also dramatically  
241 reduced mortality and morbidity due to malaria in the same period, but climate change, parasite  
242 resistance to frontline medications and insecticides, and humanitarian crises threaten to derail  
243 progress [12]. While evidence for the relationship between helminths and malaria remains  
244 mixed, there is a clear and urgent need to continue integrated efforts towards reducing the global  
245 burden of disease from these parasites.

#### 246 **Acknowledgements**

247 The authors thank the study participants and caregivers for their participation in this study, and  
248 the study team for their work in enrollment, care, testing and follow-up of study participants.

249

#### 250 **Funding Statement**

251 This study was funded by the United States National Institutes of Health and was awarded to CJ  
252 (NINDS, R01 NS055349, Fogarty International Center, D43TW010928).

#### 253 **Supporting Information**

254 S1 Text. Molecular methods

255 S1 Table. Assay performances

256 S2 Table. Regression analysis

257       References

- 258    1.    Vaz Nery S, Pickering AJ, Abate E, Asmare A, Barrett L, Benjamin-Chung J, et al. The  
259    role of water, sanitation and hygiene interventions in reducing soil-transmitted helminths:  
260    interpreting the evidence and identifying next steps. *Parasit Vectors*. 2019;12: 273.  
261    doi:10.1186/s13071-019-3532-6
- 262    2.    Ferrari AJ, Santomauro DF, Aali A, Abate YH, Abbafati C, Abbastabar H, et al. Global  
263    incidence, prevalence, years lived with disability (YLDs), disability-adjusted life-years  
264    (DALYs), and healthy life expectancy (HALE) for 371 diseases and injuries in 204  
265    countries and territories and 811 subnational locations, 1990–2021: a systematic analysis  
266    for the Global Burden of Disease Study 2021. *The Lancet*. 2024. doi:10.1016/S0140-  
267    6736(24)00757-8
- 268    3.    NUTMAN TB. Human infection with *Strongyloides stercoralis* and other related  
269    Strongyloides species. *Parasitology*. 2017;144: 263–273.  
270    doi:10.1017/S0031182016000834
- 271    4.    Pullan RL, Smith JL, Jasrasaria R, Brooker SJ. Global numbers of infection and disease  
272    burden of soil transmitted helminth infections in 2010. *Parasit Vectors*. 2014;7: 37.  
273    doi:10.1186/1756-3305-7-37
- 274    5.    Capone D, Barker T, Cumming O, Flemister A, Geason R, Kim E, et al. Persistent Ascaris  
275    Transmission Is Possible in Urban Areas Even Where Sanitation Coverage Is High.  
276    *Environ Sci Technol*. 2022;56: 15969–15980. doi:10.1021/acs.est.2c04667
- 277    6.    Albonico M, Allen H, Chitsulo L, Engels D, Gabrielli AF, Savioli L. Controlling soil-  
278    transmitted helminthiasis in pre-school-age children through preventive chemotherapy.  
279    *PLoS Neglected Tropical Diseases*. Public Library of Science; 2008.  
280    doi:10.1371/journal.pntd.0000126
- 281    7.    Webster JP, Molyneux DH, Hotez PJ, Fenwick A. The contribution of mass drug  
282    administration to global health: past, present and future. *Philosophical Transactions of the*  
283    *Royal Society B: Biological Sciences*. 2014;369: 20130434. doi:10.1098/rstb.2013.0434
- 284    8.    Kabatereine NB, Tukahebwa EM, Kazibwe F, Twa-Twa JM, Barenzi JFZ, Zaramba S, et  
285    al. Short communication: Soil-transmitted helminthiasis in Uganda: epidemiology and  
286    cost of control. *Tropical Medicine & International Health*. 2005;10: 1187–1189.  
287    doi:10.1111/j.1365-3156.2005.01509.x
- 288    9.    Kabatereine NB, Fleming FM, Nyandindi U, Mwanza JCL, Blair L. The control of  
289    schistosomiasis and soil-transmitted helminths in East Africa. *Trends Parasitol*. 2006;22:  
290    332–339. doi:10.1016/j.pt.2006.05.001
- 291    10.   Alderman H, Konde-Lule J, Sebuliba I, Bundy D, Hall A. Effect on weight gain of  
292    routinely giving albendazole to preschool children during child health days in Uganda:

- 293 cluster randomised controlled trial. *BMJ*. 2006;333: 122.  
294 doi:10.1136/bmj.38877.393530.7C
- 295 11. White NJ. Severe malaria. *Malar J*. 2022;21: 284. doi:10.1186/s12936-022-04301-8
- 296 12. World Health Organization. World malaria report 2023. Geneva; 2023.
- 297 13. Afolabi MO, Adebisi A, Cano J, Sartorius B, Greenwood B, Johnson O, et al. Prevalence  
298 and distribution pattern of malaria and soil-transmitted helminth co-endemicity in sub-  
299 Saharan Africa, 2000–2018: A geospatial analysis. *PLoS Negl Trop Dis*. 2022;16:  
300 e0010321. doi:10.1371/journal.pntd.0010321
- 301 14. Brooker S, Akhwale W, Pullan R, Estambale B, Clarke SE, Snow RW, et al.  
302 Epidemiology of plasmodium-helminth co-infection in Africa: populations at risk,  
303 potential impact on anemia, and prospects for combining control. *Am J Trop Med Hyg*.  
304 2007;77: 88–98.
- 305 15. Afolabi MO, Ale BM, Dabira ED, Agbla SC, Bustinduy AL, Ndiaye JLA, et al. Malaria  
306 and helminth co-infections in children living in endemic countries: A systematic review  
307 with meta-analysis. *PLoS Negl Trop Dis*. 2021;15: e0009138.  
308 doi:10.1371/journal.pntd.0009138
- 309 16. Degarege A, Veledar E, Degarege D, Erko B, Nacher M, Madhivanan P. *Plasmodium*  
310 *falciparum* and soil-transmitted helminth co-infections among children in sub-Saharan  
311 Africa: a systematic review and meta-analysis. *Parasit Vectors*. 2016;9: 344.  
312 doi:10.1186/s13071-016-1594-2
- 313 17. Namazzi R, Opoka R, Datta D, Bangirana P, Batte A, Berrens Z, et al. Acute Kidney  
314 Injury Interacts With Coma, Acidosis, and Impaired Perfusion to Significantly Increase  
315 Risk of Death in Children With Severe Malaria. *Clinical Infectious Diseases*. 2022;75:  
316 1511–1519. doi:10.1093/cid/ciac229
- 317 18. Fuhrmann S, Winkler MS, Kabatereine NB, Tukahebwa EM, Halage AA, Rutebemberwa  
318 E, et al. Risk of Intestinal Parasitic Infections in People with Different Exposures to  
319 Wastewater and Fecal Sludge in Kampala, Uganda: A Cross-Sectional Study. Bethony  
320 JM, editor. *PLoS Negl Trop Dis*. 2016;10: e0004469. doi:10.1371/journal.pntd.0004469
- 321 19. Capone D, Berendes D, Cumming O, Knee J, Nalá R, Risk BB, et al. Analysis of Fecal  
322 Sludges Reveals Common Enteric Pathogens in Urban Maputo, Mozambique. *Environ Sci*  
323 *Technol Lett*. 2020;7: 889–895. doi:10.1021/acs.estlett.0c00610
- 324 20. Capone D, Ferguson A, Gribble MO, Brown J. Open Defecation Sites, Unmet Sanitation  
325 Needs, and Potential Sanitary Risks in Atlanta, Georgia, 2017–2018. *Am J Public Health*.  
326 2018;108: 1238–1240. doi:10.2105/AJPH.2018.304531
- 327 21. Liu J, Gratz J, Amour C, Nshama R, Walongo T, Maro A, et al. Optimization of  
328 Quantitative PCR Methods for Enteropathogen Detection. Chan KH, editor. *PLoS One*.  
329 2016;11: e0158199. doi:10.1371/journal.pone.0158199

- 330 22. Kodani M, Winchell JM. Engineered combined-positive-control template for real-time  
331 reverse transcription-PCR in multiple-pathogen-detection assays. *J Clin Microbiol.*  
332 2012;50: 1057–1060. doi:10.1128/JCM.05987-11
- 333 23. Bottomley C, Kirby MJ, Lindsay SW, Alexander N. Can the buck always be passed to the  
334 highest level of clustering? *BMC Med Res Methodol.* 2016;16: 29. doi:10.1186/s12874-  
335 016-0127-1
- 336 24. Tinkitina B, Beinamaryo P, Adriko M, Nabatte B, Arinaitwe M, Mubangizi A, et al.  
337 Prevalence and intensity of soil-transmitted helminth infections in Uganda: Results from  
338 population-based prevalence surveys in five districts. *PLoS Negl Trop Dis.* 2023;17:  
339 e0011605. doi:10.1371/journal.pntd.0011605
- 340 25. O’Connell EM, Nutman TB. Molecular Diagnostics for Soil-Transmitted Helminths. *The*  
341 *American Society of Tropical Medicine and Hygiene.* 2016;95: 508–513.  
342 doi:10.4269/ajtmh.16-0266
- 343 26. Liu J, Platts-Mills JA, Juma J, Kabir F, Nkeze J, Okoi C, et al. Use of quantitative  
344 molecular diagnostic methods to identify causes of diarrhoea in children: a reanalysis of  
345 the GEMS case-control study. *Lancet.* 2016;388: 1291–301. doi:10.1016/S0140-  
346 6736(16)31529-X
- 347 27. Platts-Mills JA, Liu J, Rogawski ET, Kabir F, Lertsethtakarn P, Siguas M, et al. Use of  
348 quantitative molecular diagnostic methods to assess the aetiology, burden, and clinical  
349 characteristics of diarrhoea in children in low-resource settings: a reanalysis of the MAL-  
350 ED cohort study. *Lancet Glob Health.* 2018;6: e1309–e1318. doi:10.1016/S2214-  
351 109X(18)30349-8
- 352 28. Knee J, Sumner T, Adriano Z, Anderson C, Bush F, Capone D, et al. Effects of an urban  
353 sanitation intervention on childhood enteric infection and diarrhea in Maputo,  
354 Mozambique: A controlled before-and-after trial. *Elife.* 2021;10. doi:10.7554/eLife.62278
- 355 29. Mandal RK, Schmidt NW. Mechanistic insights into the interaction between the host gut  
356 microbiome and malaria. *PLoS Pathog.* 2023;19: e1011665.  
357 doi:10.1371/journal.ppat.1011665
- 358 30. Organization WH. Ending the neglect to attain the Sustainable Development Goals: a road  
359 map for neglected tropical diseases 2021–2030. World Health Organization; 2020.
- 360 31. Papaiakevou M, Gasser RB, Littlewood DTJ. Quantitative PCR-Based Diagnosis of Soil-  
361 Transmitted Helminth Infections: Faecal or Fickle? *Trends Parasitol.* 2019;35: 491–500.  
362 doi:10.1016/j.pt.2019.04.006
- 363 32. Pecson BM, Barrios JA, Johnson DR, Nelson KL. A Real-Time PCR Method for  
364 Quantifying Viable *Ascaris* Eggs Using the First Internally Transcribed Spacer Region of  
365 Ribosomal DNA. *Appl Environ Microbiol.* 2006;72: 7864–7872.  
366 doi:10.1128/AEM.01983-06

- 367 33. Cringoli G, Maurelli MP, Levecke B, Bosco A, Vercruysse J, Utzinger J, et al. The Mini-  
368 FLOTAC technique for the diagnosis of helminth and protozoan infections in humans and  
369 animals. *Nat Protoc.* 2017;12: 1723–1732. doi:10.1038/nprot.2017.067
- 370 34. Bartlett AW, Traub R, Amaral S, Hii SF, Clarke NE, Matthews A, et al. Comparison  
371 between Quantitative Polymerase Chain Reaction and Sodium Nitrate Flotation  
372 Microscopy in Diagnosing Soil-Transmitted Helminth Infections. *Am J Trop Med Hyg.*  
373 2021;105: 1210–1213. doi:10.4269/ajtmh.21-0227
- 374 35. Anderson AL, Allen T. Mapping Historic Hookworm Disease Prevalence in the Southern  
375 Us, Comparing Percent Prevalence with Percent Soil Drainage Type Using GIS.  
376 *Infectious Diseases: Research and Treatment.* 2011;4: IDRT.S6762.  
377 doi:10.4137/IDRT.S6762
- 378 36. Havens L, Castles R. The evaluation of the hookworm problem of Alabama by counties.  
379 *The Journal of Preventative Medicine.* 1930;4: 109–114.
- 380 37. Bofu RM, Santos EM, Msugupakulya BJ, Kahamba NF, Swilla JD, Njalambaha R, et al.  
381 The needs and opportunities for housing improvement for malaria control in southern  
382 Tanzania. *Malar J.* 2023;22: 69. doi:10.1186/s12936-023-04499-1
- 383
